# Supplementary material for: Transient mTOR inhibition rescues 4-1BB CAR-Tregs from tonic signal-induced dysfunction
Source: Nat Commun. 2021 Nov 8;12:6446. doi: 10.1038/s41467-021-26844-1 (PMC8575891; doi:10.1038/s41467-021-26844-1)
Supplement: Supplementary file 1 — Supplementary Information [file 41467_2021_26844_MOESM1_ESM.pdf]

# **SUPPLEMENTARY INFORMATION**

## **Supplementary Figures**

- Supplementary Figure 1 ..... p2
- Supplementary Figure 2 ..... p3
- Supplementary Figure 3 ..... p4
- Supplementary Figure 4 ..... p5
- Supplementary Figure 5 ..... p6
- Supplementary Figure 6 ..... p7
- Supplementary Figure 7 ..... p8
- Supplementary Figure 8 ..... p9

## **Supplementary Tables**

- Supplementary Table 1 ..... p10
- Supplementary Table 2 ..... p10

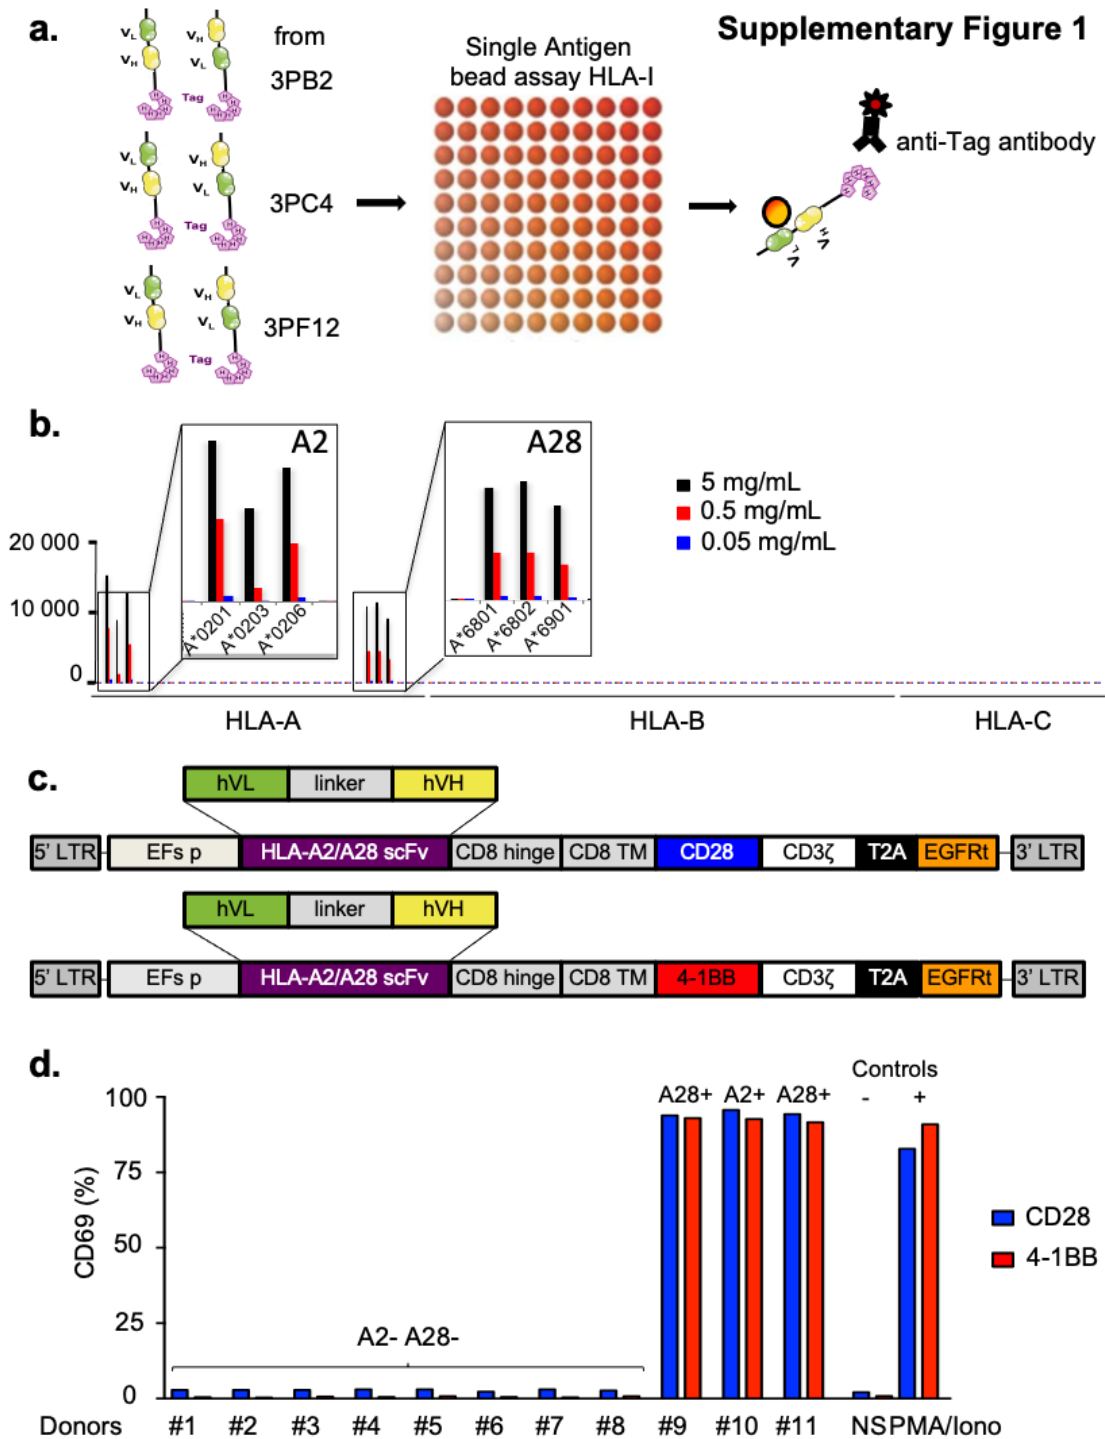

**Supplementary Figure 1: Selection of specific scFvs for CD28 and 4-1BB CAR constructs.**

**a-b.** Six tagged scFvs were tested against the Luminex single antigen bead assay (class I HLA) at different concentrations and specificity was assessed after PE-conjugated anti-tag staining. **a.** Schematic design of the experiment. **b.** Histogram representing the specificity of selected scFvs at different concentrations. **c.** CD28 and 4-1BB CAR constructs with the same framework and scFv against HLA-A2 and HLA-A28. **d.** Histogram representing the frequency of activated CAR-J.RT3-T3.5 cells (CD69-positive cells) after 24h of co-culture with splenocytes according to HLA type.

## Supplementary Figure 2

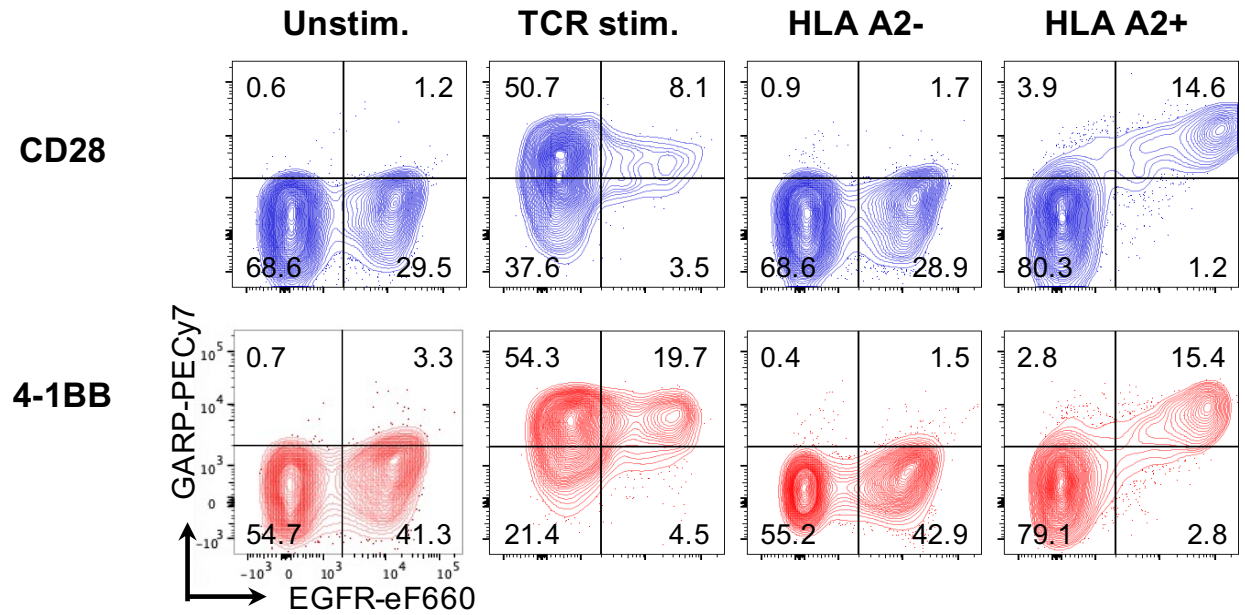

### Supplementary Figure 2: CAR stimulation induces GARP expression.

On day 11, CD28 and 4-1BB CAR-Tregs were incubated with or without anti-CD3/CD28 beads (TCR stim.) or HLA-A2-positive or HLA-A2-negative irradiated splenocytes. GARP and EGFR expressions were measured by flow cytometry. Contour plots are representative of 2 experiments.

### Supplementary Figure 3

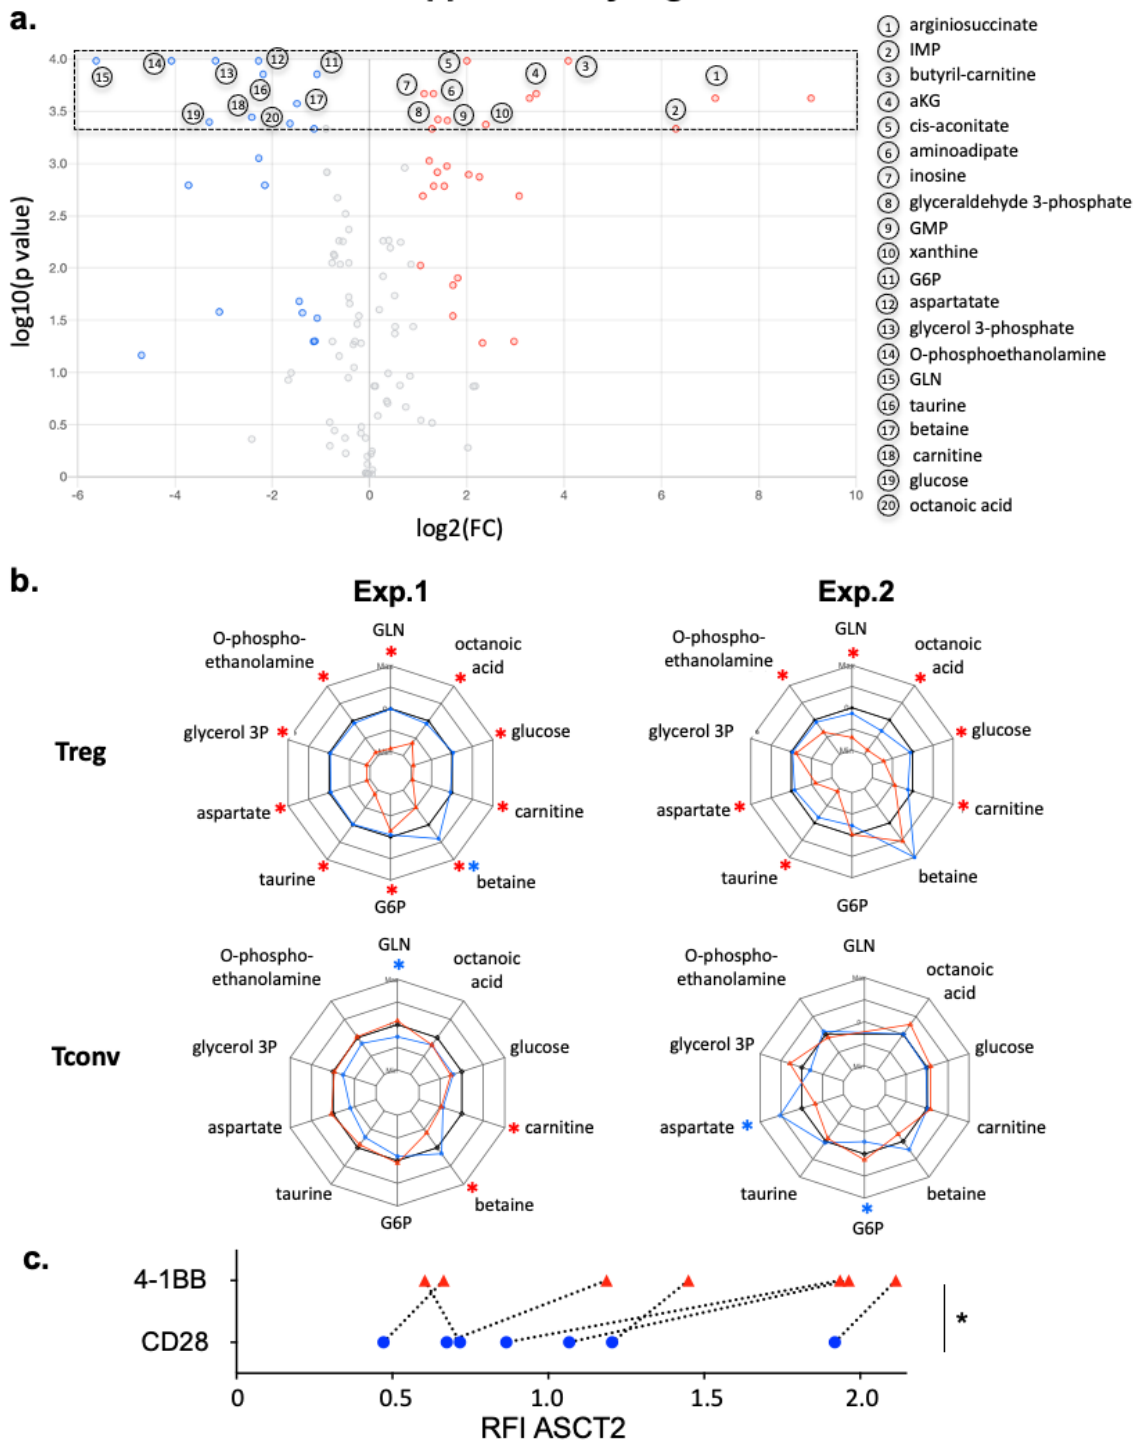

### Supplementary Figure 3: 4-1BB tonic signal-induced metabolic changes.

**a.** Volcano plot representing the fold change of metabolites detected in untransduced (blue) versus 4-1BB CAR-Tregs (red). The top 20 differentially expressed metabolites are indicated.

**b.** Radar plots representing the fold change of the indicated metabolites in CD28 (blue), 4-1BB (red) and untransduced (black) CAR-Tregs (upper panels) or CAR-Tconvs (lower panels) of two independent experiments.

**c.** On day 16, ASCT2 expression was measured by flow cytometry. The ratios of CD28 CAR-Tregs/UT and 4-1BB CAR-Tregs/UT of 7 independent experiments are shown. Two-tailed Wilcoxon matched-pairs signed rank test  $*p < 0.05$ . Exact  $p$ -value = 0.0312.

## Supplementary Figure 4

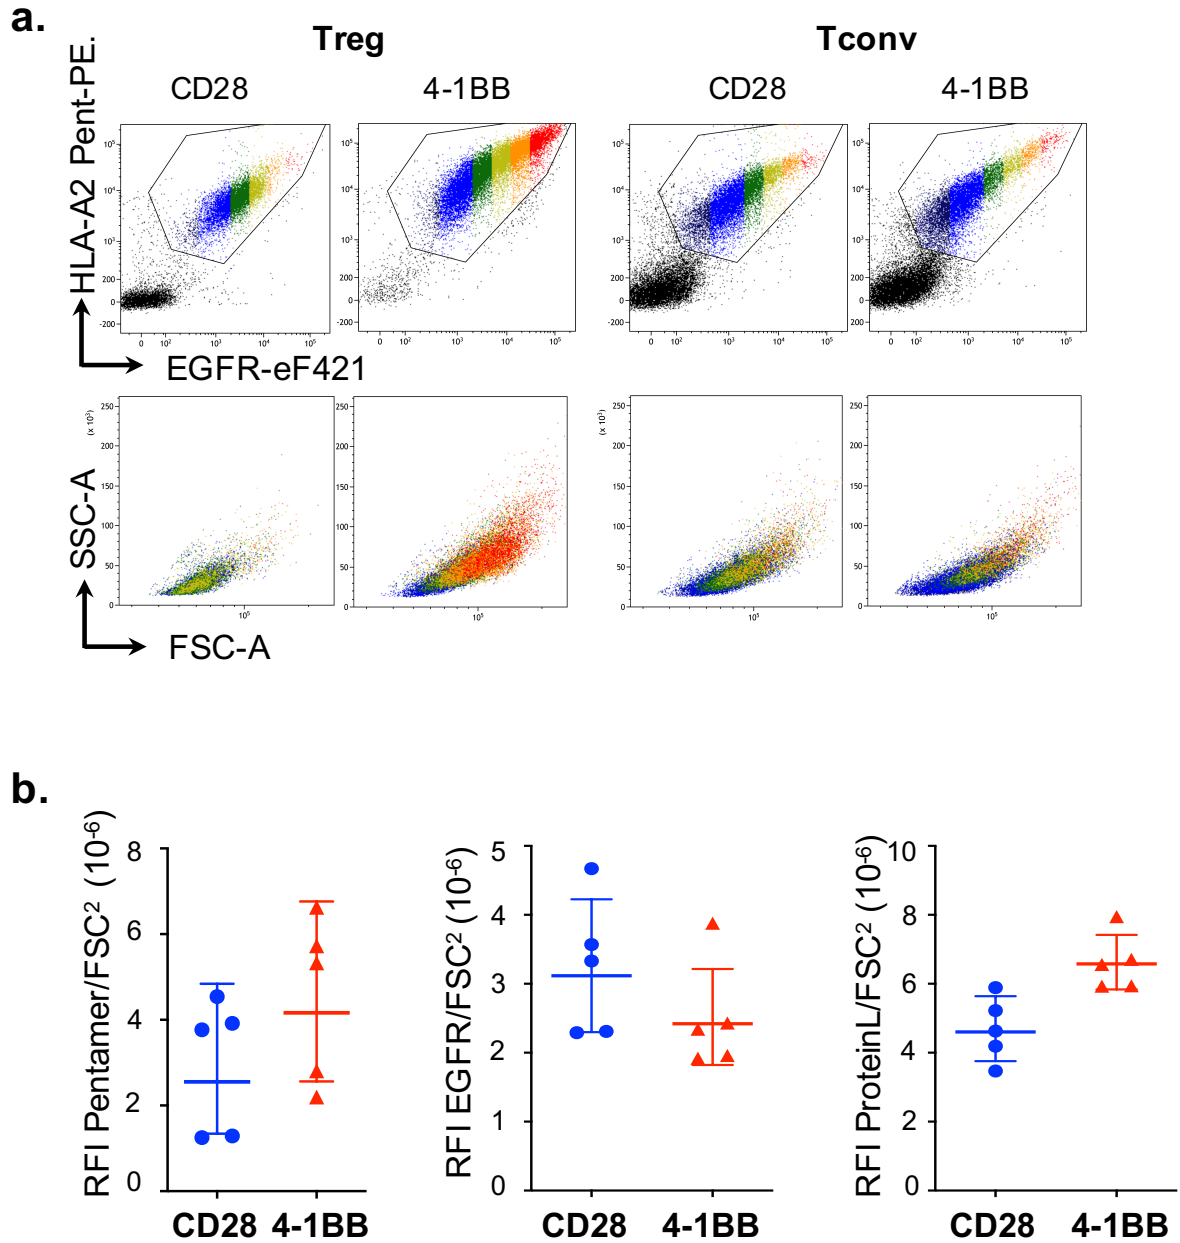

**Supplementary Figure 4: Correlation between blastic phenotype and increased CAR/EGFRt expression.**

**a.** Flow cytometry analysis of HLA-A2 pentamer binding and EGFRt reporter gene expression (upper panel) and side and forward (lower panel) scatter parameter MFIs of 4-1BB and CD28 CAR-Tregs on day 11 of culture. A color scale was applied to gate transduced cells. Dot plots are representative of 7 experiments. **b.** Ratios of pentamer MFI (left panel), EGFR MFI (middle panel) and protein L MFI (right panel) normalized to CAR-Treg cell surface estimated by as squared FSC are represented and correspond to 5 independent experiments. Geometric means with geometric SD are shown.

## Supplementary Figure 5

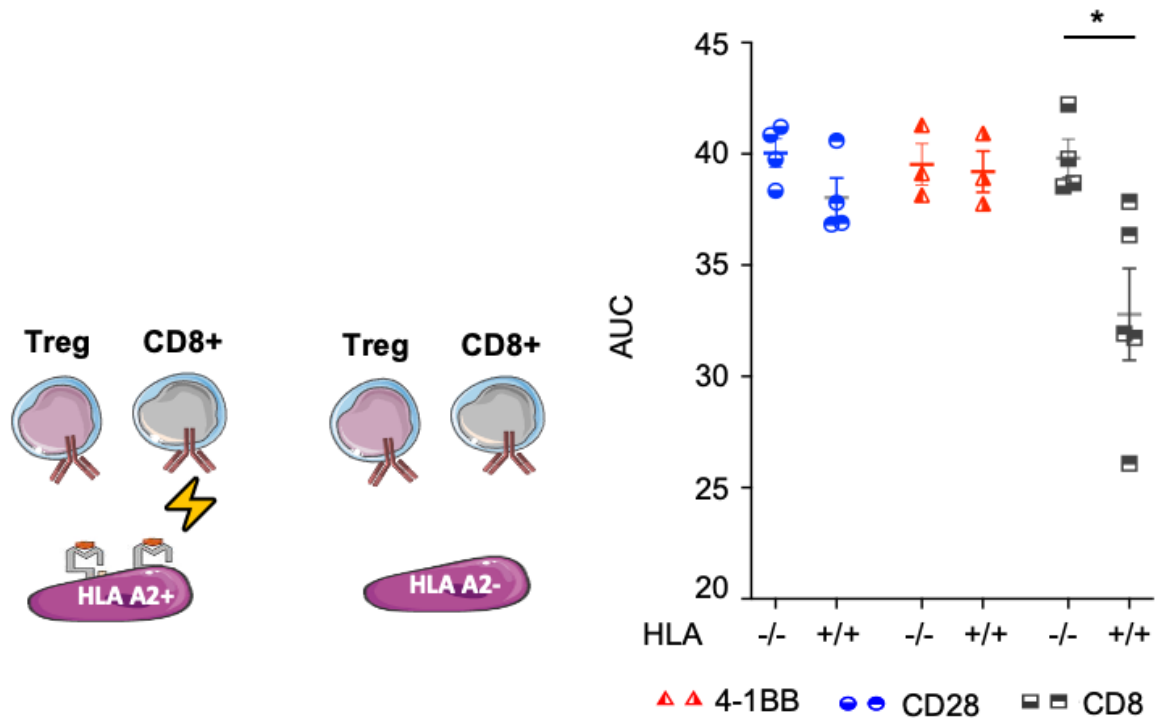

### Supplementary Figure 5: 4-1BB CSD does not induce cytotoxic CAR Tregs.

Scheme of the xCELLigence cytotoxicity assay. HLA-A2<sup>+</sup> endothelial cells (ECs) or HLA-A2<sup>-</sup> ECs were cocultured with CD28 (n=4) or 4-1BB CAR-Treg (n=3) or cytotoxic CD8<sup>+</sup> CAR-Tconv cells (n=5 with HLA-A2<sup>+</sup>; n=4 with HLA-A2<sup>-</sup>). The areas under the curve (AUCs) from 4 independent experiments are shown. Mean  $\pm$  SEM is depicted. Two-tailed Mann-Whitney test. \*p<0.05. Exact p-value = 0.0159

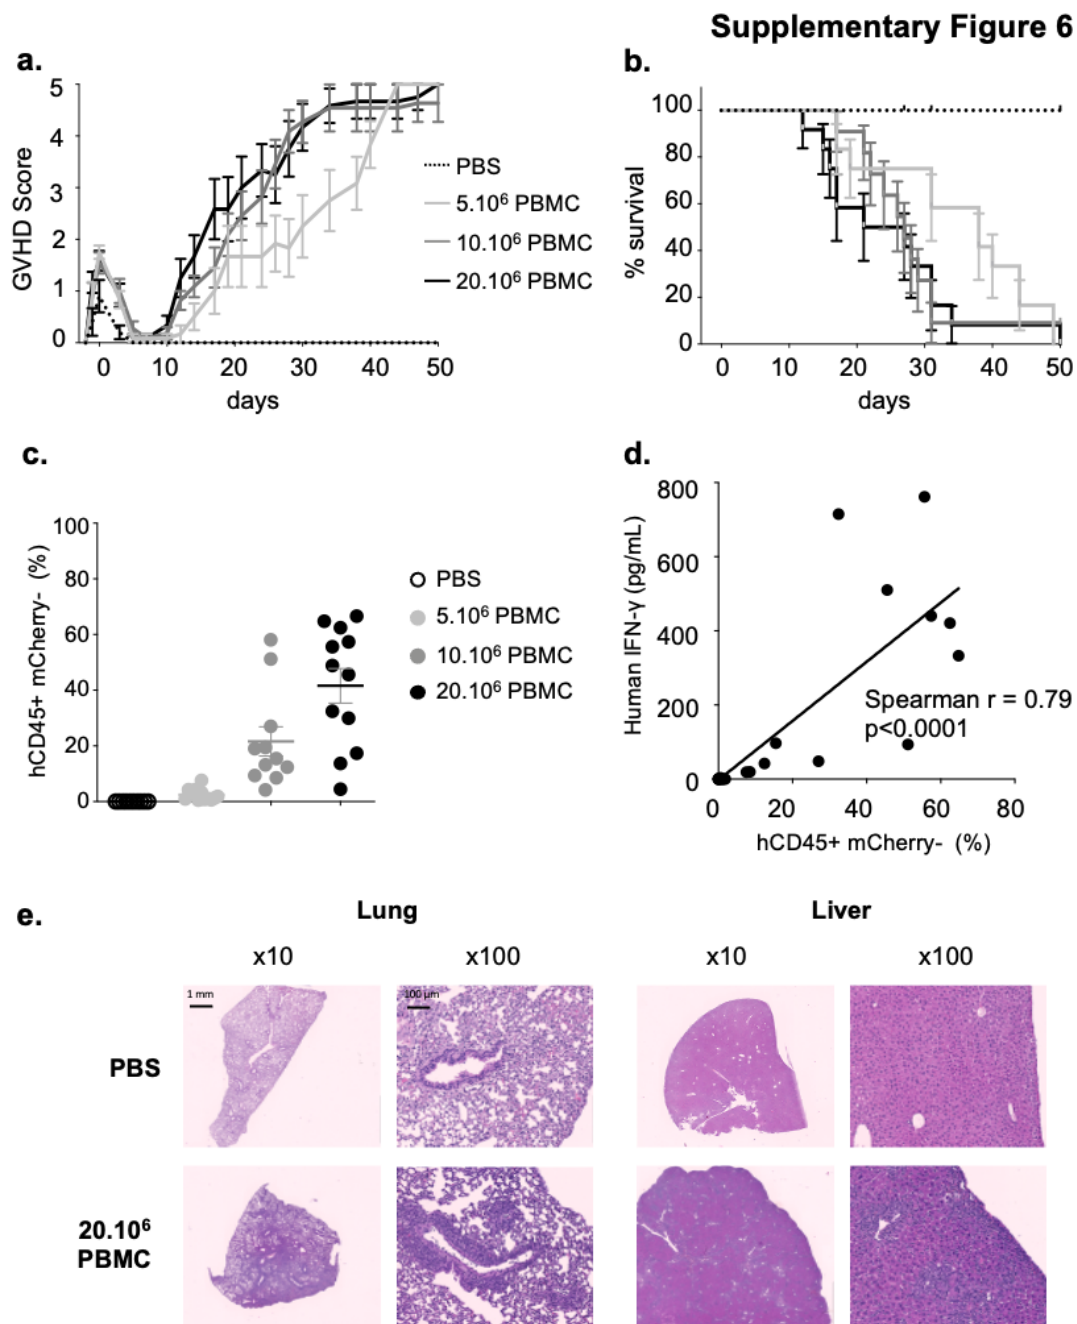

**Supplementary Figure 6: XenoGVHD model using the busulfan conditioning regimen.**

Eight- to 12-week-old male NSG mice were conditioned with busulfan on day -2 and day -1 before IV injection with the indicated number of HLA-A2+ PBMCs (PBS  $n=10$ , 5.10<sup>6</sup> PBMC  $n=12$ , 10.10<sup>6</sup> PBMC  $n=11$  and 20.10<sup>6</sup> PBMC  $n=12$ ). Mice were weighed and scored for GVHD 3 times weekly and bled weekly for flow cytometry analysis. **a.** GVHD score. **b.** Survival curves. **c.** Ten days post cell injection, the proportion of hCD45+ cells among total CD45+ cells (hCD45+ and mCD45+) was determined by flow cytometry. **d.** Ten, 17 and 24 days post-cell injection, the concentration of human IFN $\gamma$  in the plasma was measured using cytometry bead array and correlated with the human chimerism. **e.** Representative anatomopathological analysis of lesions in the liver and lung performed at day 30 in NSG mice injected with 20 x 10<sup>6</sup> HLA-A2+ PBMCs. Mean $\pm$ SD is represented.  $N=3$  mice per group from at least 3 independent experiments and 3 different donors.

## Supplementary Figure 7

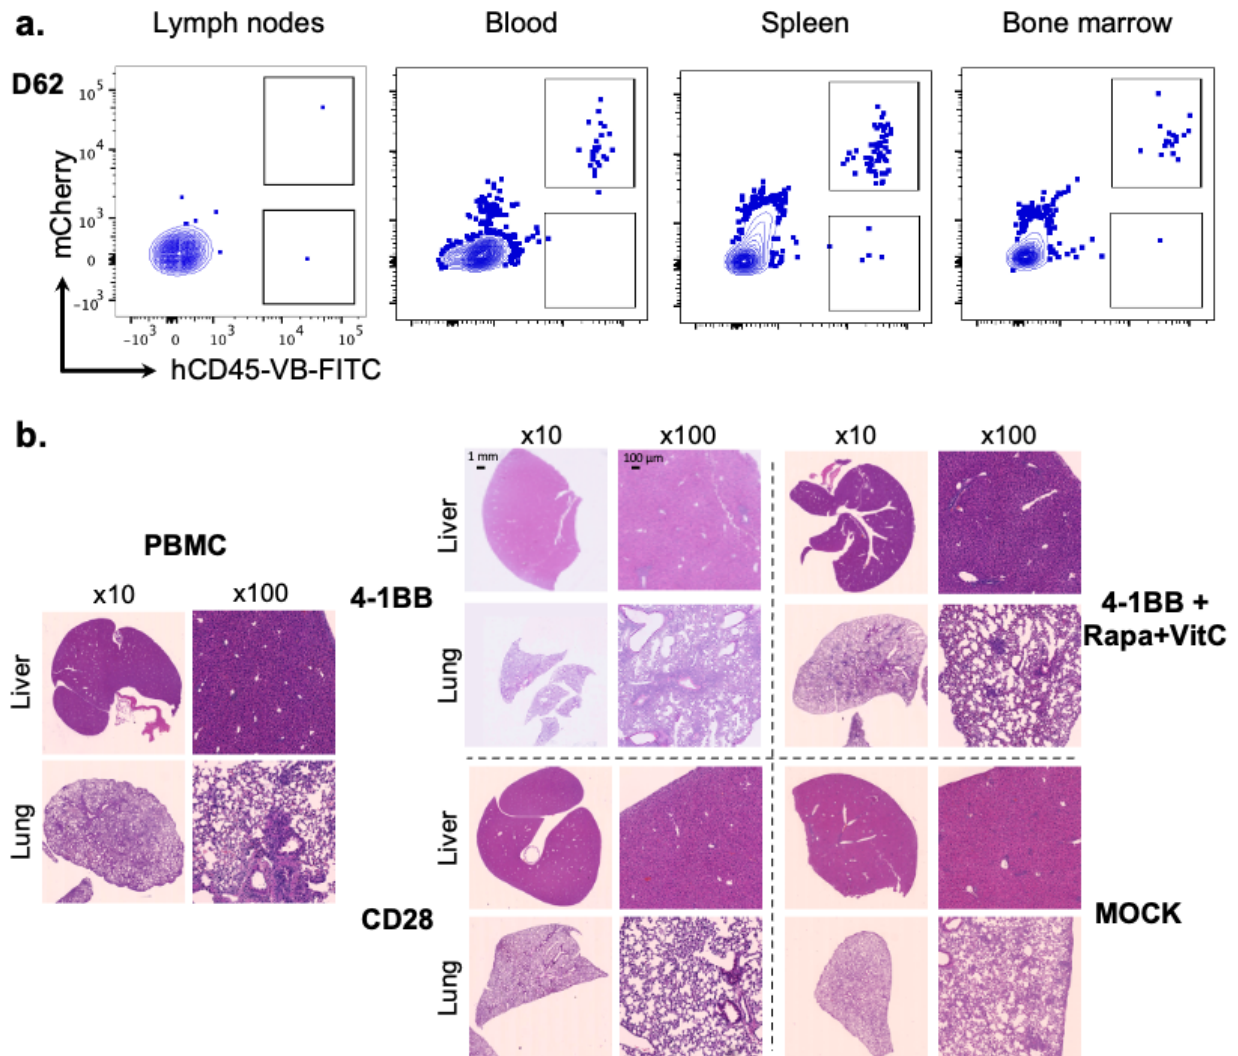

**Supplementary Figure 7: CAR-Tregs detection in the xenoGVHD model.**

**a.** Representative contour plots at sacrifice (day 60-62) of murine and human cells in the blood, spleen and bone marrow. **b.** Representative pathological features of infiltrates in liver and lung at sacrifice (either when mouse reached GVHD score >4 or at day 60 corresponding to the end of experiment) in NSG mice injected with  $5 \times 10^6$  HLA-A2+ PBMC followed by retro orbital injection of  $5 \times 10^6$  of the indicated type of Tregs.

## Supplementary Figure 8

### a. Naïve Treg sorting strategy (from CD4+ enriched PBMC)

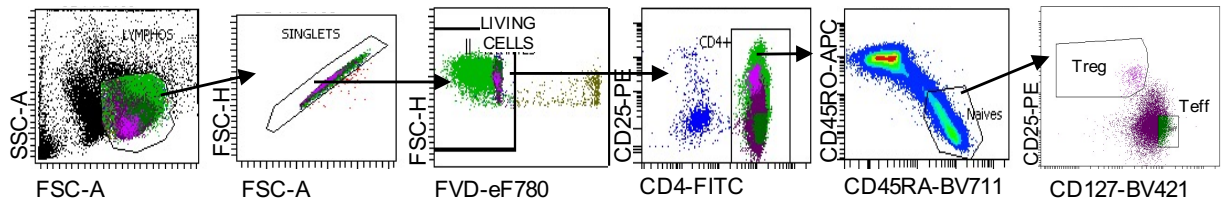

### b. CAR/mCherry-expressing or non-expressing cell sorting

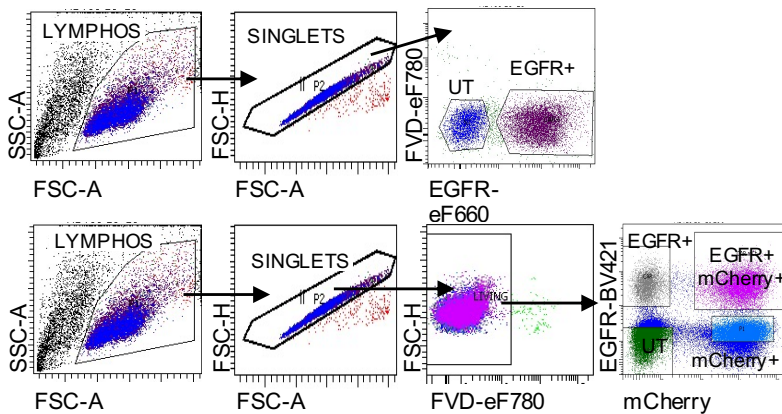

### c. TCR- vs CAR-mediated activation

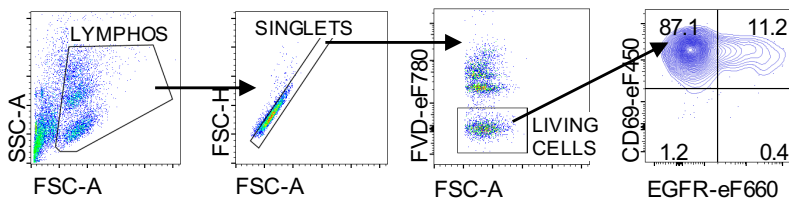

## Supplementary Figure 8. Gating strategies used for cell sorting and FACS analyses.

**a.** Gating strategy to sort Treg (CD4+CD45RO-CD45RA+CD25+CD127-) and Tconv (CD4+CD45RO-CD45RA+CD25-CD127+) cells from CD4-positive-enriched PBMCs, depicted on Figure 1b. **b.** Gating strategy to sort CAR-expressing (EGFR+) or non-expressing (EGFR-) cells, or CAR/Luciferase-expressing (EGFR+mCherry+) or single transduced (EGFR+ or mCherry+) cells referred to as CAR-Treg sorting in Figure 1c. **c.** Gating strategy for FACS analysis of TCR/CAR-mediated CAR-Treg activation depicted on Figure 1d.

The same strategy was used at D16 of culture for tSNE mapping of CD28 and 4-1BB CAR-Tregs (Figure 3a), CD28 and 4-1BB CAR-Treg or CAR-Tconv stability (Figure 4a), phosphoS6 staining in 4-1BB CAR-Tregs cultured with or without rapamycin and vitamin C (Figure 5a), TCR/CAR-mediated activation assay in UT or CAR-Tregs (Figure 8a, 8b).

Abbreviation: LYMPHOS = Lymphocytes

**Supplementary Table 1: qPCR and digital droplet PCR primers**

|                          | Primer denomination | target                                         | 5' > 3' primer sequence  |
|--------------------------|---------------------|------------------------------------------------|--------------------------|
| CAR transcripts by qPCR  | qPCR_scFv_10F       | scFv                                           | TCAGCAGAAGCCCGGCAAG      |
|                          | qPCR_scFv_10R       |                                                | TCCGCCAAAGGTCAGTGGGA     |
|                          | qPCR_EGFRt_9F       | EGFRt reporter gene                            | GACTGCGTCTCTTGCCGGAAT    |
|                          | qPCR_EGFRt_9R       |                                                | AAGGTTGCACTTGTCACGCA     |
|                          | HPRT F              | HPRT housekeeping gene                         | TTGCTTTCCCTTGGTCAGGCA    |
|                          | HPRT R              |                                                | ATCCAACACTTCGTGGGGTC     |
| VCN calculation by ddPCR | hAlb-F              | Albumin housekeeping gene                      | ACTCATGGGAGCTGCTGGTTC    |
|                          | hAlb-R              |                                                | GCTGTCATCTCTTGTGGGCTGT   |
|                          | hAlb-Probe (VIC)    |                                                | CGTGTATGCCACACAAATCTCTCC |
|                          | Psi-F               | viral Psi sequence<br>(encapsidation sequence) | CAGGACTCGGCTTGCTGAAG     |
|                          | Psi-R               |                                                | TCCCCCGCTTAATACTGACG     |
|                          | Psi-Probe (FAM)     |                                                | CGCACGGCAAGAGGCGAGG      |

**Supplementary Table 2: List of antibodies and staining reagents**

| Name                                      | Fluorophore          | Clone         | Manufacturer            | Catalog number | Dilution |
|-------------------------------------------|----------------------|---------------|-------------------------|----------------|----------|
| anti-Mouse IgG (H+L)                      | Alexa Fluor 647      |               | ThermoFisher Scientific | A31571         | 1/100    |
| ASCT2 Fc fusion RBD                       | unconjugated         | SLC1A5        | Metafora                | ASCT2-M25      | 1/50     |
| CCR7                                      | PE Cy7               | 3D12 (RUO)    | BD Biosciences          | 557648         | 1/20     |
| CD107a                                    | Brilliant Violet 786 | H4A3          | BD Biosciences          | 563869         | 1/20     |
| CD127                                     | Brilliant Violet 421 | HIL-7R-M21    | BD Biosciences          | 562436         | 1/50     |
| CD137                                     | Brilliant Violet 605 | 4B4-1         | Sony biotechnology      | 2149140        | 1/20     |
| CD152                                     | PE Cy5               | BNi3          | BD Biosciences          | 555854         | 1/5      |
| CD15s                                     | Brilliant Violet 510 | CSLEX1        | BD Biosciences          | 563529         | 1/20     |
| CD25                                      | PE                   | M-A251        | BD Biosciences          | 555432         | 1/10     |
| CD278                                     | PerCPCyamine5.5      | C398.4A       | Ozyme                   | 313518         | 1/25     |
| CD4                                       | FITC                 | SK3/SK4       | BD Biosciences          | 347413         | 1/5      |
| CD45RA                                    | Brilliant Violet 711 | HI100         | Ozyme                   | 304138         | 1/50     |
| CD45RO                                    | APC                  | UCHL1         | BD Biosciences          | 559865         | 1/25     |
| CD69                                      | eFluor 450           | FN50          | ThermoFisher Scientific | 48-0699-42     | 1/25     |
| CD8                                       | PerCP Cy5,5          | RPA-T8        | BD Biosciences          | 560662         | 1/20     |
| EGFR                                      | eFluor 660           | ME1B3         | ThermoFisher Scientific | 50-9509-42     | 1/25     |
| FOXP3                                     | PE                   | PCH101        | ThermoFisher Scientific | 12-4776-42     | 1/20     |
| FVD eF780                                 | eFluor 780           |               | ThermoFisher Scientific | 65-0865-18     | 1/1000   |
| Granzyme B                                | Brilliant Violet 510 | GB11          | BD Biosciences          | 563388         | 1/20     |
| CD45                                      | VioBright FITC       | 5B1           | Miltenyi Biotec         | 130-104-517    | 1/50     |
| HELIOS                                    | eFluor 450           | 21F6          | ThermoFisher Scientific | 48-9883-42     | 1/25     |
| HLA-A2/A28                                | FITC                 |               | OneLambda               | FH0037         | 1/10     |
| HLA-DR                                    | APC-R700             | G46-6         | BD Biosciences          | 565127         | 1/20     |
| Ki67                                      | FITC                 | B56 and MIB 1 | BD Biosciences          | 556028         | 1/5      |
| mouse CD45                                | V450                 | 30-F11        | BD Biosciences          | 560501         | 1/33     |
| Phospho-S6 Ribosomal Protein (Ser235/236) | Alexa Fluor 700      | D57.2.2E      | Ozyme                   | 270365         | 1/50     |
| Pro5 MHC Pentamer A2                      | PE                   |               | Prolimmune              | F010-2A-E      | 1/20     |
| Protein L                                 | biotinylated         |               | Thermo Scientific       | 29997          | 1/1500   |
| Streptavidin                              | Brilliant Violet 421 |               | BD Biosciences          | 563259         | 1/1000   |
| TIGIT                                     | APC                  | A15153G       | Sony biotechnology      | 2463530        | 1/20     |
